# Supplementary material
Source: MDPI journal article supplement (https://www.mdpi.com/2313-4321/3/2/16)
Supplement: s1 [file s1]

**Table 1: Cross comparison of five material flows and key conditions**

✓ Condition met      ✕ Condition not met

|                                                |                                                                  | MATERIAL FLOWS      |          |                       |                           |            |
|------------------------------------------------|------------------------------------------------------------------|---------------------|----------|-----------------------|---------------------------|------------|
|                                                |                                                                  | Paper and cardboard | Plastics | Non-wearable textiles | Construction / demolition | Mattresses |
| <b>KEY CONDITIONS FOR HIGH-GRADE RECYCLING</b> | <input type="checkbox"/> Adequate collection system/logistics    | ✓                   | ✓        | ✕                     | ✕                         | ✕          |
|                                                | <input type="checkbox"/> Guaranteed volumes of supply            | ✓                   | ✕        | ✕                     | ✕                         | ✕          |
|                                                | <input type="checkbox"/> Market demand for recycled materials    | ✓                   | ✕        | ✕                     | ✕                         | ✕          |
|                                                | <input type="checkbox"/> Quality guarantee of recycled materials | ✓                   | ✕        | ✕                     | ✕                         | ✕          |

**Table 2: Cross comparison of five materials flows and key drivers**

✓ Key driver in place      × Key driver not in place

|                                                                                      |                                                  | <b>MATERIAL FLOWS</b> |          |                       |                           |            |
|--------------------------------------------------------------------------------------|--------------------------------------------------|-----------------------|----------|-----------------------|---------------------------|------------|
|                                                                                      |                                                  | Paper and cardboard   | Plastics | Non-wearable textiles | Construction / demolition | Mattresses |
| <b>KEY DRIVERS THAT HELP CIRCUMVENT FUNDAMENTAL BARRIERS TO HIGH-GRADE RECYCLING</b> | 1. Mobilizing power by change agent(s)           | ✓                     | ✓        | ×                     | ×                         | ×          |
|                                                                                      | 2. Cooperation in material chain                 | ✓                     | ✓        | ×                     | ×                         | ×          |
|                                                                                      | 3. Well-attuned financial arrangements           | ✓                     | ✓        | ×                     | ×                         | ×          |
|                                                                                      | 4. Circular procurement                          | ✓                     | ×        | ×                     | ×                         | ×          |
|                                                                                      | 5. Technological innovation (including redesign) | ×                     | ×        | ×                     | ×                         | ×          |
